# Supplementary material for: The duration of antibiotic treatment is associated with carriage of toxigenic and non-toxigenic strains of Clostridioides difficile in dogs
Source: PLOS journal article supplement (doi:10.1371/journal.pone.0245949), 2021-05-12
Supplement: S1 (10.1371/journal.pone.0245949.s001) [file journal.pone.0245949.s001]

**S1 File Owner questionnaire for risk factors for *C. difficile* carriage in dogs  
and associations with clinical disease**

Owner name\_\_\_\_\_ Date\_\_\_\_\_

Small Animal Hospital ID\_\_\_\_\_

Information on your dog

Name\_\_\_\_\_ Sex Male /Female (delete as necessary)

Breed\_\_\_\_\_ Age \_\_\_\_\_

Faecal sample provided? Yes ☐ No ☐ Normal faeces ☐ Diarrhoea ☐

1. What diet do you normally feed your dog?

\_\_\_\_\_  
\_\_\_\_\_

Please list any treats, titbits or food you occasionally feed your dog

\_\_\_\_\_  
\_\_\_\_\_

2. Do you ever feed raw meat to your dog ?

☐ Yes

☐ No

3. Do you have any other pets in your home?

☐ Yes

☐ No

Please tell us about the other pets in your home

Total number of dogs\_\_\_\_\_

Total number of cats\_\_\_\_\_

Please list any other pets\_\_\_\_\_

4. Can you tell us about the people who live in your home?

Total number of people ?\_\_\_\_\_

Total number of infants (less than 2 years old)\_\_\_\_\_

Total number of people over 65 years?\_\_\_\_\_
