# Supplementary material for: The duration of antibiotic treatment is associated with carriage of toxigenic and non-toxigenic strains of Clostridioides difficile in dogs
Source: PLoS One. 2021 May 12;16(5):e0245949. doi: 10.1371/journal.pone.0245949 (PMC8115768; doi:10.1371/journal.pone.0245949)
Supplement: S1 Dataset — (CSV) [file pone.0245949.s005.csv]

C_difficile_carriage	Age_months	Cooked_meat	Raw_meat	Other_pets	Number_pets	Household_size	infant_or_over65	Ab_last_3m	Days_ Ab_therapy	2_or_more_Ab	Immunosup	Antacid	Overnight stay_hosp	Visits_hosp
0	18	N	N	Y	2	two_or_less	N	N	0	0	N	N	0	0
0	122	N	N	Y	2	two_or_less	N	N	0	0	N	N	0	0
0	96	Y	N	N	1	two_or_less	N	N	0	0	N	N	0	0
1	168	Y	N	N	1	two_or_less	N	Y	7	1	N	N	0	0
0	156	N	N	Y	3	two_or_less	N	N	0	0	N	N	0	0
0	63	Y	N	N	1	two_or_less	N	Y	10	1	N	N	0	0
0	56	N	N	Y	2	two_or_less	N	N	0	0	N	N	0	0
0	36	Y	N	Y	2	two_or_less	N	N	0	0	N	N	0	0
0	12	Y	N	Y	6	over two	N	N	0	0	N	N	0	0
0	9	N	N	Y	2	over two	Y	N	0	0	N	N	0	0
1	138	Y	N	N	1	over two	N	N	0	0	N	N	0	0
0	45	Y	N	N	1	over two	N	N	0	0	N	N	0	0
0	30	N	N	N	1	over two	N	N	0	0	N	N	0	0
0	120	Y	N	N	1	over two	N	Y	16	2	N	Y	0	0
0	11	N	N	Y	3	NA	N	N	0	0	N	N	0	0
0	13	N	N	Y	3	NA	N	N	0	0	N	N	0	0
0	36	N	N	Y	2	over two	N	Y	2	1	N	Y	1	0
0	78	Y	N	N	1	over two	N	Y	2	2	N	Y	1	0
0	120	N	N	N	1	over two	N	N	0	0	N	N	1	0
0	130	N	N	N	1	over two	N	Y	1	1	N	Y	1	0
0	115	N	N	N	1	two_or_less	N	N	0	0	N	N	0	0
0	144	N	Y	N	1	two_or_less	N	N	0	0	N	N	0	0
0	144	Y	N	N	1	two_or_less	N	Y	10	1	N	N	0	0
0	100	N	N	Y	3	two_or_less	N	N	0	0	N	N	0	0
0	18	Y	N	Y	2	two_or_less	N	N	0	0	N	N	0	0
1	108	N	N	Y	6	over two	N	N	0	0	N	N	0	0
0	108	Y	N	Y	6	over two	Y	N	0	0	N	N	0	0
0	139	Y	N	N	1	over two	N	N	0	0	N	N	0	0
0	141	N	N	Y	3	over two	N	N	0	0	N	N	0	0
0	84	N	N	Y	2	over two	Y	N	0	0	N	N	0	0
0	72	N	Y	Y	3	over two	N	N	0	0	N	N	0	0
0	120	N	N	Y	2	over two	N	N	0	0	N	N	0	0
0	53	Y	N	Y	2	over two	N	N	0	0	N	N	0	0
1	88	Y	N	N	1	over two	N	N	0	0	Y	N	0	0
1	108	N	N	Y	3	over two	N	N	0	0	N	N	0	0
0	84	N	N	Y	3	over two	N	N	0	0	N	N	0	0
0	99	Y	N	Y	5	over two	N	N	0	0	N	N	0	0
0	87	Y	N	Y	5	over two	N	N	0	0	N	N	0	0
0	15	N	N	Y	4	over two	Y	N	0	0	N	N	0	0
0	87	N	N	Y	5	over two	Y	N	0	0	N	N	0	0
0	60	Y	N	N	1	over two	N	Y	1	1	N	Y	1	0
0	77	Y	N	N	1	over two	N	N	0	0	Y	N	1	0
0	60	N	Y	N	1	over two	N	N	0	0	N	N	1	0
0	60	N	Y	Y	3	over two	N	N	0	0	N	N	1	0
1	10	Y	N	N	1	over two	Y	N	0	0	N	N	1	0
0	48	N	N	N	1	over two	N	N	0	0	N	N	1	0
0	84	Y	N	Y	2	two_or_less	N	Y	2	2	N	N	1	0
0	18	N	N	Y	3	two_or_less	N	N	0	0	N	N	1	0
1	108	N	N	N	1	two_or_less	N	Y	1	1	N	Y	0	1
0	8	N	Y	Y	2	two_or_less	N	N	0	0	N	N	0	1
0	24	Y	N	N	1	two_or_less	Y	N	0	0	N	Y	0	1
0	168	Y	N	Y	2	two_or_less	N	Y	6	1	N	N	0	1
0	31	N	N	Y	4	two_or_less	N	N	0	0	N	N	0	1
0	31	Y	N	N	1	two_or_less	N	N	0	0	N	N	0	1
0	3.5	Y	N	Y	2	two_or_less	N	N	0	0	N	N	0	1
0	84	N	N	N	1	two_or_less	N	N	0	0	N	N	0	1
0	126	N	N	Y	5	two_or_less	N	N	0	0	N	N	0	1
0	48	Y	Y	N	1	two_or_less	N	Y	1	1	N	N	0	1
0	3	N	N	Y	7	two_or_less	N	N	0	0	N	N	0	1
0	144	Y	N	N	1	two_or_less	N	N	0	0	N	N	0	1
0	84	N	N	N	1	over two	N	Y	5	1	N	N	0	1
0	108	Y	N	Y	2	over two	Y	N	0	0	N	N	0	1
0	8	N	N	Y	4	over two	N	N	0	0	N	N	0	1
0	108	N	N	N	1	over two	Y	N	0	0	N	N	0	1
0	54	Y	Y	N	1	over two	N	N	0	0	N	N	0	1
0	77	N	N	Y	2	over two	Y	N	0	0	N	N	0	1
1	36	Y	N	Y	4	over two	N	Y	7	1	N	N	0	1
0	120	Y	N	N	1	over two	N	N	0	0	N	N	0	1
1	49	N	N	N	1	over two	N	Y	21	1	N	N	0	1
0	156	N	N	N	1	over two	N	N	0	0	N	N	0	1
0	53	N	N	N	1	over two	N	N	0	0	N	N	0	1
0	72	N	N	Y	3	two_or_less	N	Y	5	1	N	N	1	1
0	124	Y	N	N	1	two_or_less	N	N	0	0	N	N	1	1
0	128	N	N	Y	3	two_or_less	N	Y	8	1	N	N	1	1
0	108	N	N	Y	4	over two	N	N	0	0	N	N	1	1
1	30	N	N	Y	2	two_or_less	N	Y	2	1	N	N	1	1
0	48	Y	N	N	1	over two	Y	N	0	0	N	N	1	1
0	58	Y	N	N	1	two_or_less	N	Y	9	2	N	Y	1	1
1	62	N	Y	N	1	two_or_less	Y	N	0	0	Y	N	1	1
0	2	N	N	Y	2	over two	N	N	0	0	N	N	NA	1
1	96	N	N	N	1	two_or_less	N	Y	7	1	N	N	0	1
0	119	N	N	N	1	two_or_less	N	Y	6	1	N	N	0	1
0	84	N	N	N	1	two_or_less	Y	Y	10	1	N	N	0	1
1	82	Y	N	N	1	two_or_less	N	Y	10	1	N	N	0	1
1	132	N	N	N	1	two_or_less	N	Y	1	1	N	Y	0	1
1	69	N	N	N	1	two_or_less	N	Y	92	1	N	N	0	1
0	91	Y	N	Y	2	two_or_less	N	Y	81	1	N	N	0	1
0	151	Y	N	Y	3	two_or_less	N	N	0	0	N	N	0	1
0	138	N	N	N	1	two_or_less	N	Y	14	1	N	N	0	1
0	75	N	N	N	1	two_or_less	N	Y	28	1	N	Y	0	1
0	112	N	N	Y	11	two_or_less	N	N	0	0	N	N	0	1
0	24	N	Y	Y	3	two_or_less	N	N	0	0	N	N	0	1
0	12	Y	N	N	1	two_or_less	N	Y	3	2	N	N	0	1
0	86	N	N	Y	3	two_or_less	Y	N	0	0	N	N	0	1
0	124	N	N	N	1	over two	N	N	0	0	N	N	0	1
0	84	N	N	Y	4	over two	N	N	0	0	N	N	0	1
0	69	N	N	N	1	over two	N	Y	25	2	N	N	0	1
0	110	N	N	N	1	over two	N	N	0	0	N	N	0	1
1	62	Y	N	Y	4	two_or_less	Y	N	0	0	N	N	1	1
0	60	N	Y	Y	4	two_or_less	N	N	0	0	N	Y	1	1
0	56	N	N	Y	3	two_or_less	Y	N	0	0	Y	Y	1	1
0	12	N	N	N	1	over two	N	Y	14	1	N	N	1	1
0	12	Y	N	N	1	two_or_less	N	N	0	0	N	Y	1	1
0	29	Y	N	Y	2	two_or_less	N	Y	8	2	N	N	1	1
0	2	Y	N	N	1	two_or_less	N	Y	14	1	N	N	1	1
0	108	N	N	Y	6	two_or_less	N	N	0	0	Y	N	1	1
0	72	Y	N	N	1	over two	N	N	0	0	Y	N	1	1
1	50	N	N	N	1	over two	N	Y	30	2	N	N	1	1
0	139	N	N	Y	2	two_or_less	N	Y	18	1	N	Y	1	1
0	59	N	N	Y	3	two_or_less	N	N	0	0	N	N	0	1
0	88	Y	N	Y	2	two_or_less	N	N	0	0	N	N	0	1
1	93	N	N	Y	3	two_or_less	N	Y	15	2	N	Y	0	1
1	151	N	N	N	1	two_or_less	Y	N	0	0	N	N	0	1
0	48	N	N	Y	2	two_or_less	N	Y	15	2	N	Y	0	1
0	84	N	N	Y	7	two_or_less	N	N	0	0	N	N	0	1
0	79	N	Y	Y	3	two_or_less	N	N	0	0	N	N	0	1
0	115	Y	N	N	1	two_or_less	N	N	0	0	Y	Y	0	1
0	62	Y	N	N	1	two_or_less	N	N	0	0	N	N	0	1
0	108	Y	N	N	1	two_or_less	N	Y	4	1	N	N	0	1
0	112	Y	N	N	1	over two	N	N	0	0	N	N	0	1
0	62	Y	N	Y	2	over two	N	N	0	0	N	N	0	1
0	79	N	N	N	1	over two	Y	N	0	0	N	N	0	1
1	120	Y	N	N	1	over two	N	Y	91	2	Y	N	0	1
1	60	Y	Y	Y	3	over two	N	N	0	0	N	N	0	1
0	2	N	N	N	1	over two	N	N	0	0	N	N	0	1
0	79	N	N	N	1	over two	Y	Y	7	1	N	N	0	1
0	16	N	N	N	1	over two	N	N	0	0	N	N	0	1
0	13	Y	N	Y	5	over two	Y	N	0	0	N	N	0	1
0	108	N	Y	N	1	over two	N	Y	12	2	N	N	0	1
1	72	N	N	Y	2	two_or_less	N	Y	7	1	N	N	1	1
1	72	N	N	N	1	over two	N	Y	3	2	N	Y	1	1
0	84	N	N	N	1	two_or_less	N	N	7	1	N	N	1	1
0	24	Y	N	Y	2	two_or_less	N	N	0	0	N	N	1	1
0	164	N	N	N	1	two_or_less	N	N	0	0	N	N	1	1
0	144	Y	N	N	1	two_or_less	N	Y	15	1	Y	Y	1	1
0	38	Y	N	N	1	two_or_less	N	N	0	0	Y	Y	1	1
0	13	Y	N	N	1	two_or_less	N	N	0	0	N	N	0	1
0	48	N	N	N	1	two_or_less	N	Y	17	1	Y	Y	0	1
0	108	N	N	Y	3	two_or_less	N	Y	17	2	N	N	0	1
0	138	Y	N	N	1	two_or_less	Y	Y	7	1	N	N	0	1
0	16	N	N	Y	3	over two	N	Y	7	1	N	N	0	1
0	72	N	N	Y	3	over two	N	Y	10	2	N	N	0	1
0	18	N	N	Y	5	over two	N	Y	7	1	N	Y	0	1
0	18	Y	N	Y	4	over two	N	Y	10	2	N	N	0	1
0	125	N	N	Y	3	two_or_less	N	Y	1	1	N	N	1	1
1	72	N	N	Y	3	two_or_less	Y	N	0	0	N	N	1	1
0	180	Y	N	N	1	over two	N	Y	15	2	N	Y	1	1
0	96	N	N	N	1	over two	Y	N	0	0	N	N	1	1
1	174	N	N	N	1	over two	N	Y	31	2	N	N	1	1
0	3	N	N	Y	2	over two	N	Y	6	2	N	N	1	1
1	63	N	N	N	1	two_or_less	N	Y	39	2	N	Y	1	1
0	24	N	N	Y	2	two_or_less	N	Y	1	1	N	N	NA	1
0	54	N	Y	Y	3	over two	N	Y	10	1	N	N	0	2
0	101	N	N	Y	4	over two	N	Y	1	1	N	N	0	2
1	126	Y	N	N	1	over two	N	Y	10	1	N	N	0	2
0	120	N	N	N	1	two_or_less	N	Y	17	2	N	N	1	2
0	24	Y	N	Y	3	over two	Y	N	0	0	N	N	1	2
0	12	Y	N	Y	5	over two	N	Y	22	2	Y	N	1	2
0	8	Y	N	N	1	two_or_less	N	Y	15	2	N	Y	1	2
0	16	Y	N	Y	4	over two	N	Y	15	1	Y	N	1	2
0	84	N	N	Y	2	over two	N	Y	32	2	N	N	1	2
0	11	Y	Y	N	1	two_or_less	N	Y	17	1	N	N	0	2
0	96	Y	N	N	1	two_or_less	N	Y	19	1	N	Y	0	2
0	36	Y	N	N	1	two_or_less	N	Y	8	1	N	Y	0	2
0	12	N	N	Y	4	two_or_less	N	N	0	0	N	Y	0	2
0	24	Y	N	Y	16	two_or_less	N	Y	14	1	N	N	0	2
0	19	N	N	Y	2	over two	N	Y	9	2	N	N	0	2
0	78	N	N	Y	3	over two	N	Y	5	2	N	Y	0	2
0	12	Y	N	Y	2	over two	N	Y	7	2	N	N	0	2
0	48	N	N	Y	3	over two	N	N	0	0	N	N	0	2
0	48	Y	N	Y	3	over two	N	N	0	0	N	N	0	2
0	96	Y	N	Y	2	two_or_less	N	Y	11	2	N	Y	1	2
0	113	N	N	N	1	two_or_less	N	Y	38	2	N	Y	1	2
0	155	N	N	N	1	over two	N	Y	5	1	N	Y	1	2
0	9	Y	N	N	1	two_or_less	Y	Y	3	1	N	Y	0	2
0	84	Y	N	N	1	two_or_less	N	Y	12	2	N	Y	0	2
0	72	Y	N	N	1	two_or_less	N	Y	5	1	N	Y	0	2
1	78	Y	N	Y	2	over two	N	Y	35	2	N	N	0	2
0	6	N	N	Y	2	two_or_less	N	Y	17	1	N	Y	1	2
0	132	N	N	Y	3	over two	N	Y	11	2	Y	N	1	2
0	25	N	N	N	1	two_or_less	Y	Y	7	1	N	N	1	2
0	60	N	Y	Y	2	two_or_less	N	Y	35	1	N	N	0	2
0	76	Y	N	N	1	two_or_less	N	Y	5	1	Y	Y	0	2
0	36	N	N	Y	2	two_or_less	N	Y	1	1	N	N	0	2
0	129	N	Y	N	1	over two	N	Y	6	1	N	Y	1	2
0	96	N	N	Y	2	over two	N	Y	7	1	N	Y	1	2
0	93	Y	N	N	1	over two	N	Y	7	1	N	N	1	2
1	139	N	N	N	1	over two	N	Y	52	1	N	Y	1	2
0	113	N	N	N	1	two_or_less	N	Y	1	1	Y	N	1	2
1	120	Y	N	Y	2	two_or_less	N	Y	90	2	N	Y	0	2
0	120	N	N	Y	16	two_or_less	N	Y	26	2	N	N	0	2
0	134	N	N	N	1	over two	N	Y	46	1	N	N	0	2
1	108	N	N	Y	5	over two	N	Y	39	2	N	Y	0	2
1	124	N	N	N	1	two_or_less	N	Y	29	2	Y	Y	1	2
0	13	N	Y	Y	7	two_or_less	N	Y	28	2	Y	Y	1	2
1	84	Y	N	N	1	two_or_less	N	Y	47	2	N	Y	1	2
1	91	N	N	Y	4	two_or_less	N	Y	20	2	N	Y	1	2
0	73	Y	N	Y	7	two_or_less	N	Y	10	2	N	Y	1	2
0	80	N	N	N	1	two_or_less	N	Y	22	2	N	N	0	2
0	108	Y	N	Y	3	two_or_less	N	Y	26	2	N	N	0	2
