# Supplementary material for: The duration of antibiotic treatment is associated with carriage of toxigenic and non-toxigenic strains of Clostridioides difficile in dogs
Source: PLoS One. 2021 May 12;16(5):e0245949. doi: 10.1371/journal.pone.0245949 (PMC8115768; doi:10.1371/journal.pone.0245949)
Supplement: S2 Dataset — (CSV) [file pone.0245949.s006.csv]

Diarrhoea	C_difficile_detected	Toxin_genes_present
N	0	0
N	0	0
N	0	0
N	0	0
N	0	0
N	0	0
N	0	0
N	0	0
N	0	0
N	0	0
N	0	0
N	0	0
N	0	0
N	0	0
N	0	0
N	0	0
N	0	0
N	0	0
N	0	0
N	0	0
N	0	0
N	0	0
N	0	0
N	0	0
N	0	0
N	0	0
N	0	0
N	0	0
N	0	0
N	0	0
N	0	0
N	0	0
N	0	0
N	0	0
N	0	0
N	0	0
N	0	0
N	0	0
N	0	0
N	0	0
N	0	0
N	0	0
N	0	0
N	0	0
N	0	0
N	0	0
N	0	0
N	0	0
N	0	0
N	0	0
N	0	0
N	0	0
N	0	0
N	0	0
N	0	0
N	0	0
N	0	0
N	0	0
N	0	0
N	0	0
N	0	0
N	0	0
N	0	0
N	0	0
N	0	0
N	0	0
N	0	0
N	0	0
N	0	0
N	0	0
N	0	0
N	0	0
N	0	0
N	0	0
Y	0	0
Y	0	0
Y	0	0
Y	0	0
Y	0	0
Y	0	0
Y	0	0
Y	0	0
Y	0	0
Y	0	0
Y	0	0
Y	0	0
Y	0	0
Y	0	0
Y	0	0
Y	0	0
N	1	0
N	1	0
N	1	0
N	1	0
N	1	0
N	1	0
N	1	1
N	1	1
N	1	1
N	1	1
N	1	1
N	1	1
N	1	0
N	1	0
N	1	0
N	1	0
N	1	0
N	1	1
N	1	1
Y	1	0
Y	1	0
Y	1	0
Y	1	1
Y	1	0
N	1	1
N	1	1
N	0	0
N	0	0
N	0	0
N	0	0
N	0	0
N	0	0
N	0	0
N	0	0
N	0	0
N	0	0
N	0	0
N	0	0
N	0	0
N	0	0
N	0	0
N	0	0
N	0	0
N	0	0
N	0	0
N	0	0
N	0	0
N	0	0
N	0	0
N	0	0
N	0	0
N	0	0
N	0	0
N	0	0
N	0	0
N	0	0
N	0	0
N	0	0
N	0	0
N	0	0
N	0	0
N	0	0
N	0	0
N	0	0
N	0	0
N	0	0
N	0	0
N	0	0
N	0	0
N	0	0
N	0	0
N	0	0
N	0	0
N	0	0
N	0	0
N	0	0
N	0	0
N	0	0
N	0	0
N	0	0
N	0	0
N	0	0
N	0	0
N	0	0
N	0	0
N	0	0
N	0	0
N	0	0
N	0	0
N	0	0
N	0	0
N	0	0
N	0	0
N	0	0
N	0	0
N	0	0
N	0	0
N	0	0
N	0	0
N	0	0
N	0	0
N	0	0
N	0	0
N	0	0
N	0	0
N	0	0
N	0	0
N	0	0
N	0	0
N	0	0
N	0	0
N	0	0
N	0	0
N	0	0
N	0	0
N	0	0
N	0	0
N	0	0
N	0	0
N	0	0
N	0	0
N	0	0
N	0	0
N	0	0
N	0	0
N	0	0
N	0	0
N	0	0
N	0	0
N	0	0
N	0	0
N	0	0
N	0	0
N	0	0
N	0	0
N	0	0
N	0	0
N	0	0
N	0	0
Y	0	0
Y	0	0
Y	0	0
Y	0	0
Y	0	0
Y	0	0
Y	0	0
Y	0	0
Y	0	0
Y	0	0
Y	0	0
Y	0	0
Y	0	0
Y	0	0
Y	0	0
Y	0	0
Y	0	0
Y	0	0
Y	0	0
Y	0	0
Y	0	0
Y	0	0
Y	0	0
Y	0	0
Y	0	0
Y	0	0
Y	0	0
Y	0	0
Y	0	0
Y	0	0
Y	0	0
Y	0	0
Y	0	0
Y	0	0
Y	0	0
Y	0	0
Y	0	0
Y	0	0
Y	0	0
Y	0	0
Y	0	0
Y	0	0
Y	0	0
Y	0	0
Y	0	0
Y	0	0
Y	0	0
Y	0	0
Y	0	0
Y	0	0
Y	0	0
Y	0	0
Y	0	0
Y	0	0
Y	0	0
Y	0	0
Y	0	0
Y	0	0
Y	0	0
Y	0	0
Y	0	0
Y	0	0
Y	0	0
N	1	0
N	1	0
N	1	0
N	1	0
N	1	0
N	1	1
N	1	1
N	1	1
N	1	1
N	1	1
N	1	1
N	1	0
N	1	0
N	1	0
N	1	0
N	1	1
N	1	0
N	1	NA
Y	1	0
Y	1	0
Y	1	0
Y	1	0
Y	1	0
Y	1	0
Y	1	1
Y	1	0
Y	1	0
Y	1	0
Y	1	0
Y	1	0
Y	1	0
Y	1	0
Y	1	0
Y	1	1
Y	1	1
